# Supplementary material
Source: PubMed Central journal article supplement (PMC4729600)
Supplement: NIHMS745477-supplement-Related_Manuscript_File_5.pdf [file NIHMS745477-supplement-Related_Manuscript_File_5.pdf]

# ROYAL SOCIETY OF CHEMISTRY LICENSE TERMS AND CONDITIONS

Nov 06, 2015

This is an Agreement between louisiana state univerristy -- Paul Holloway ("You") and Royal Society of Chemistry ("Royal Society of Chemistry"). It consists of your order details, the terms and conditions provided by Royal Society of Chemistry, and the payment terms and conditions.

**All payments must be made in full to CCC. For payment instructions, please see information listed at the bottom of this form.**

|                                          |                                                                                           |
|------------------------------------------|-------------------------------------------------------------------------------------------|
| License Number                           | 3683701459271                                                                             |
| License date                             | Aug 07, 2015                                                                              |
| Licensed Content<br>Publisher            | Royal Society of Chemistry                                                                |
| Licensed Content<br>Publication          | Lab on a Chip                                                                             |
| Licensed Content Title                   | Characterization of a microfluidic in vitro model of the blood-brain barrier ( $\mu$ BBB) |
| Licensed Content Author                  | Ross Booth,Hanseup Kim                                                                    |
| Licensed Content Date                    | Mar 1, 2012                                                                               |
| Volume number                            | 12                                                                                        |
| Issue number                             | 10                                                                                        |
| Type of Use                              | Journal/Magazine                                                                          |
| Requestor type                           | academic/educational                                                                      |
| Portion                                  | figures/tables/images                                                                     |
| Number of figures/tables<br>/images      | 1                                                                                         |
| Format                                   | print and electronic                                                                      |
| Distribution quantity                    | 10000                                                                                     |
| Will you be translating?                 | no                                                                                        |
| Order reference number                   | 2                                                                                         |
| Title of the article                     | Modeling ischemic stroke in vitro; the status quo and future perspectives                 |
| Publication the new<br>article is in     | Stroke                                                                                    |
| Publisher of the article                 | American Heart Association                                                                |
| Author of new article                    | Paul M Holloway and Felicity N E Gavins                                                   |
| Expected publication<br>date             | Sep 2015                                                                                  |
| Estimated size of the<br>article (pages) | 10                                                                                        |
| <b>Total</b>                             | <b>0.00 USD</b>                                                                           |

## Terms and Conditions

This License Agreement is between {Requestor Name} ("You") and The Royal Society of Chemistry ("RSC") provided by the Copyright Clearance Center ("CCC"). The license consists of your order details, the terms and conditions provided by the Royal Society of Chemistry, and the payment terms and conditions.

## RSC / TERMS AND CONDITIONS

### INTRODUCTION

The publisher for this copyrighted material is The Royal Society of Chemistry. By clicking "accept" in connection with completing this licensing transaction, you agree that the following terms and conditions apply to this transaction (along with the Billing and Payment terms and conditions established by CCC, at the time that you opened your RightsLink account and that are available at any time at .

### LICENSE GRANTED

The RSC hereby grants you a non-exclusive license to use the aforementioned material anywhere in the world subject to the terms and conditions indicated herein. Reproduction of the material is confined to the purpose and/or media for which permission is hereby given.

### RESERVATION OF RIGHTS

The RSC reserves all rights not specifically granted in the combination of (i) the license details provided by your and accepted in the course of this licensing transaction; (ii) these terms and conditions; and (iii) CCC's Billing and Payment terms and conditions.

#### REVOCATION

The RSC reserves the right to revoke this license for any reason, including, but not limited to, advertising and promotional uses of RSC content, third party usage, and incorrect source figure attribution.

#### THIRD-PARTY MATERIAL DISCLAIMER

If part of the material to be used (for example, a figure) has appeared in the RSC publication with credit to another source, permission must also be sought from that source. If the other source is another RSC publication these details should be included in your RightsLink request. If the other source is a third party, permission must be obtained from the third party. The RSC disclaims any responsibility for the reproduction you make of items owned by a third party.

#### PAYMENT OF FEE

If the permission fee for the requested material is waived in this instance, please be advised that any future requests for the reproduction of RSC materials may attract a fee.

#### ACKNOWLEDGEMENT

The reproduction of the licensed material must be accompanied by the following acknowledgement:

Reproduced ("Adapted" or "in part") from {Reference Citation} (or Ref XX) with permission of The Royal Society of Chemistry. If the licensed material is being reproduced from New Journal of Chemistry (NJC), Photochemical & Photobiological Sciences (PPS) or Physical Chemistry Chemical Physics (PCCP) you must include one of the following acknowledgements:

For figures originally published in NJC:

Reproduced ("Adapted" or "in part") from {Reference Citation} (or Ref XX) with permission of The Royal Society of Chemistry (RSC) on behalf of the European Society for Photobiology, the European Photochemistry Association and the RSC.

For figures originally published in PPS:

Reproduced ("Adapted" or "in part") from {Reference Citation} (or Ref XX) with permission of The Royal Society of Chemistry (RSC) on behalf of the Centre National de la Recherche Scientifique (CNRS) and the RSC.

For figures originally published in PCCP:

Reproduced ("Adapted" or "in part") from {Reference Citation} (or Ref XX) with permission of the PCCP Owner Societies.

#### HYPertext LINKS

With any material which is being reproduced in electronic form, you must include a hypertext link to the original RSC article on the RSC's website. The recommended form for the hyperlink is <http://dx.doi.org/10.1039/DOI> suffix, for example in the link <http://dx.doi.org/10.1039/b110420a> the DOI suffix is 'b110420a'. To find the relevant DOI suffix for the RSC article in question, go to the Journals section of the website and locate the article in the list of papers for the volume and issue of your specific journal. You will find the DOI suffix quoted there.

#### LICENSE CONTINGENT ON PAYMENT

While you may exercise the rights licensed immediately upon issuance of the license at the end of the licensing process for the transaction, provided that you have disclosed complete and accurate details of your proposed use, no license is finally effective unless and until full payment is received from you (by CCC) as provided in CCC's Billing and Payment terms and conditions. If full payment is not received on a timely basis, then any license preliminarily granted shall be deemed automatically revoked and shall be void as if never granted. Further, in the event that you breach any of these terms and conditions or any of CCC's Billing and Payment terms and conditions, the license is automatically revoked and shall be void as if never granted. Use of materials as described in a revoked license, as well as any use of the materials beyond the scope of an unrevoked license, may constitute copyright infringement and the RSC reserves the right to take any and all action to protect its copyright in the materials.

#### WARRANTIES

The RSC makes no representations or warranties with respect to the licensed material.

#### INDEMNITY

You hereby indemnify and agree to hold harmless the RSC and the CCC, and their respective officers, directors, trustees, employees and agents, from and against any and all claims arising out of your use of the licensed material other than as specifically authorized pursuant to this licence.

#### NO TRANSFER OF LICENSE

This license is personal to you or your publisher and may not be sublicensed, assigned, or transferred by you to any other person without the RSC's written permission.

#### NO AMENDMENT EXCEPT IN WRITING

This license may not be amended except in a writing signed by both parties (or, in the case of "Other Conditions, v1.2", by CCC on the RSC's behalf).

#### OBJECTION TO CONTRARY TERMS

You hereby acknowledge and agree that these terms and conditions, together with CCC's Billing and Payment terms and conditions (which are incorporated herein), comprise the entire agreement between you and the RSC (and CCC) concerning this licensing transaction, to the exclusion of all other terms and conditions, written or verbal, express or implied (including any terms contained in any purchase order, acknowledgment, check endorsement or other writing prepared by you). In the event of any conflict between your obligations established by these terms and conditions and those established by CCC's Billing and Payment terms and conditions, these terms and conditions shall control.

#### JURISDICTION

This license transaction shall be governed by and construed in accordance with the laws of the District of Columbia. You hereby agree to submit to the jurisdiction of the courts located in the District of Columbia for purposes of resolving any disputes that may arise in connection with this licensing transaction.

#### LIMITED LICENSE

The following terms and conditions apply to specific license types:

##### Translation

This permission is granted for non-exclusive world English rights only unless your license was granted for translation rights. If you licensed translation rights you may only translate this content into the languages you requested. A professional translator must perform all translations and reproduce the content word for word preserving the integrity of the article.

##### Intranet

If the licensed material is being posted on an Intranet, the Intranet is to be password-protected and made available only to bona fide students or employees only. All content posted to the Intranet must maintain the copyright information line on the bottom of each image. You must also fully reference the material and include a hypertext link as specified above.

##### Copies of Whole Articles

All copies of whole articles must maintain, if available, the copyright information line on the bottom of each page.

##### Other Conditions

##### v1.2

Gratis licenses (referencing \$0 in the Total field) are free. Please retain this printable license for your reference. No payment is required.

If you would like to pay for this license now, please remit this license along with your payment made payable to "COPYRIGHT CLEARANCE CENTER" otherwise you will be invoiced within 48 hours of the license date. Payment should be in the form of a check or money order referencing your account number and this invoice number {Invoice Number}.

Once you receive your invoice for this order, you may pay your invoice by credit card.

Please follow instructions provided at that time.

##### Make Payment To:

Copyright Clearance Center

Dept 001

P.O. Box 843006

Boston, MA 02284-3006

For suggestions or comments regarding this order, contact Rightslink Customer Support: [customercare@copyright.com](mailto:customercare@copyright.com) or +1-855-239-3415 (toll free in the US) or +1-978-646-2777.

**Questions? [customercare@copyright.com](mailto:customercare@copyright.com) or +1-855-239-3415 (toll free in the US) or +1-978-646-2777.**

---

---
