# Supplementary material
Source: PubMed Central journal article supplement (PMC4729600)
Supplement: NIHMS745477-supplement-Related_Manuscript_File_6.pdf [file NIHMS745477-supplement-Related_Manuscript_File_6.pdf]

# NATURE PUBLISHING GROUP LICENSE TERMS AND CONDITIONS

Nov 06, 2015

This is an Agreement between louisiana state univerrcity -- Paul Holloway ("You") and Nature Publishing Group ("Nature Publishing Group"). It consists of your order details, the terms and conditions provided by Nature Publishing Group, and the payment terms and conditions.

**All payments must be made in full to CCC. For payment instructions, please see information listed at the bottom of this form.**

|                                                 |                                                                                      |
|-------------------------------------------------|--------------------------------------------------------------------------------------|
| License Number                                  | 3683710474014                                                                        |
| License date                                    | Aug 07, 2015                                                                         |
| Licensed Content Publisher                      | Nature Publishing Group                                                              |
| Licensed Content Publication                    | Nature Methods                                                                       |
| Licensed Content Title                          | A microfluidic culture platform for CNS axonal injury, regeneration and transport    |
| Licensed Content Author                         | Anne M Taylor,Mathew Blurton-Jones,Seog Woo Rhee,David H Cribbs,Carl W Cotman et al. |
| Licensed Content Date                           | Aug 1, 2005                                                                          |
| Volume number                                   | 2                                                                                    |
| Issue number                                    | 8                                                                                    |
| Type of Use                                     | reuse in a journal/magazine                                                          |
| Requestor type                                  | academic/university or research institute                                            |
| Format                                          | print and electronic                                                                 |
| Portion                                         | figures/tables/illustrations                                                         |
| Number of figures/tables /illustrations         | 1                                                                                    |
| High-res required                               | no                                                                                   |
| Figures                                         | Figure 1                                                                             |
| Author of this NPG article                      | no                                                                                   |
| Your reference number                           | 4                                                                                    |
| Title of the article                            | Modeling ischemic stroke in vitro; the status quo and future perspectives            |
| Publication the new article is in               | Stroke                                                                               |
| Publisher of your article                       | American Heart Association                                                           |
| Author of the article                           | Paul M Holloway and Felicity N E Gavins                                              |
| Expected publication date                       | Sep 2015                                                                             |
| Estimated size of new article (number of pages) | 10                                                                                   |
| <b>Total</b>                                    | <b>0.00 USD</b>                                                                      |
| <a href="#">Terms and Conditions</a>            |                                                                                      |

## Terms and Conditions for Permissions

Nature Publishing Group hereby grants you a non-exclusive license to reproduce this material for this purpose, and for no other use,subject to the conditions below:

1. NPG warrants that it has, to the best of its knowledge, the rights to license reuse of this material. However, you should ensure that the material you are requesting is original to Nature Publishing Group and does not carry the copyright of another entity (as credited in the published version). If the credit line on any part of the material you have requested indicates that it was reprinted or adapted by NPG with permission from another source, then you should also seek permission from that source to reuse the material.
2. Permission granted free of charge for material in print is also usually granted for any electronic version of that work, provided that the material is incidental to the work as a whole and that the electronic version is essentially equivalent to, or substitutes for, the print version.Where print permission has been granted for a fee, separate permission must

be obtained for any additional, electronic re-use (unless, as in the case of a full paper, this has already been accounted for during your initial request in the calculation of a print run).NB: In all cases, web-based use of full-text articles must be authorized separately through the 'Use on a Web Site' option when requesting permission.

3. Permission granted for a first edition does not apply to second and subsequent editions and for editions in other languages (except for signatories to the STM Permissions Guidelines, or where the first edition permission was granted for free).
4. Nature Publishing Group's permission must be acknowledged next to the figure, table or abstract in print. In electronic form, this acknowledgement must be visible at the same time as the figure/table/abstract, and must be hyperlinked to the journal's homepage.
5. The credit line should read:  
Reprinted by permission from Macmillan Publishers Ltd: [JOURNAL NAME] (reference citation), copyright (year of publication)  
For AOP papers, the credit line should read:  
Reprinted by permission from Macmillan Publishers Ltd: [JOURNAL NAME], advance online publication, day month year (doi: 10.1038/sj.[JOURNAL ACRONYM].XXXXX)

**Note: For republication from the *British Journal of Cancer*, the following credit lines apply.**

Reprinted by permission from Macmillan Publishers Ltd on behalf of Cancer Research UK: [JOURNAL NAME] (reference citation), copyright (year of publication)  
For AOP papers, the credit line should read:  
Reprinted by permission from Macmillan Publishers Ltd on behalf of Cancer Research UK: [JOURNAL NAME], advance online publication, day month year (doi: 10.1038/sj.[JOURNAL ACRONYM].XXXXX)

6. Adaptations of single figures do not require NPG approval. However, the adaptation should be credited as follows:

Adapted by permission from Macmillan Publishers Ltd: [JOURNAL NAME] (reference citation), copyright (year of publication)

**Note: For adaptation from the *British Journal of Cancer*, the following credit line applies.**

Adapted by permission from Macmillan Publishers Ltd on behalf of Cancer Research UK: [JOURNAL NAME] (reference citation), copyright (year of publication)

7. Translations of 401 words up to a whole article require NPG approval. Please visit <http://www.macmillanmedicalcommunications.com> for more information. Translations of up to a 400 words do not require NPG approval. The translation should be credited as follows:

Translated by permission from Macmillan Publishers Ltd: [JOURNAL NAME] (reference citation), copyright (year of publication).

**Note: For translation from the *British Journal of Cancer*, the following credit line applies.**

Translated by permission from Macmillan Publishers Ltd on behalf of Cancer Research UK: [JOURNAL NAME] (reference citation), copyright (year of publication)

We are certain that all parties will benefit from this agreement and wish you the best in the use of this material. Thank you.

Special Terms:

v1.1

Questions? [customercare@copyright.com](mailto:customercare@copyright.com) or +1-855-239-3415 (toll free in the US) or +1-978-646-2777.

---
